# Supplementary material for: Measurement Report: Comparative Analysis of Fluorescing African Dust Particles in Spain and Puerto Rico
Source: Copernicus journal article supplement (doi:10.5194/egusphere-2024-446), 2024-02-23
Supplement: Supplementary file 1 [file egusphere-2024-446-supplement.pdf]

1 *Supplement of*  
2  
3 **Comparative Analysis of Fluorescing African Dust Particles in Spain and Puerto Rico**  
4 Sarangi et al.  
5

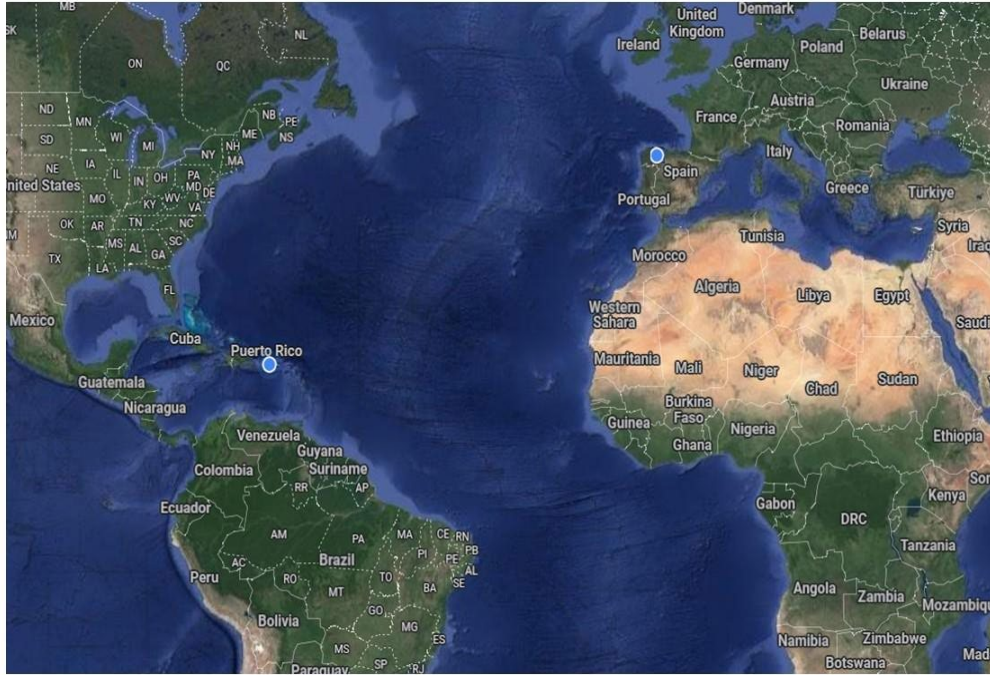

6 *Figure S1. Study zone in Puerto Rico, the US territory and province of León, Spain. The blue circles on the map*  
7 *are the locations of the sampling sites. This figure was generated using © Google Earth Pro 7.3.*  
8  
9

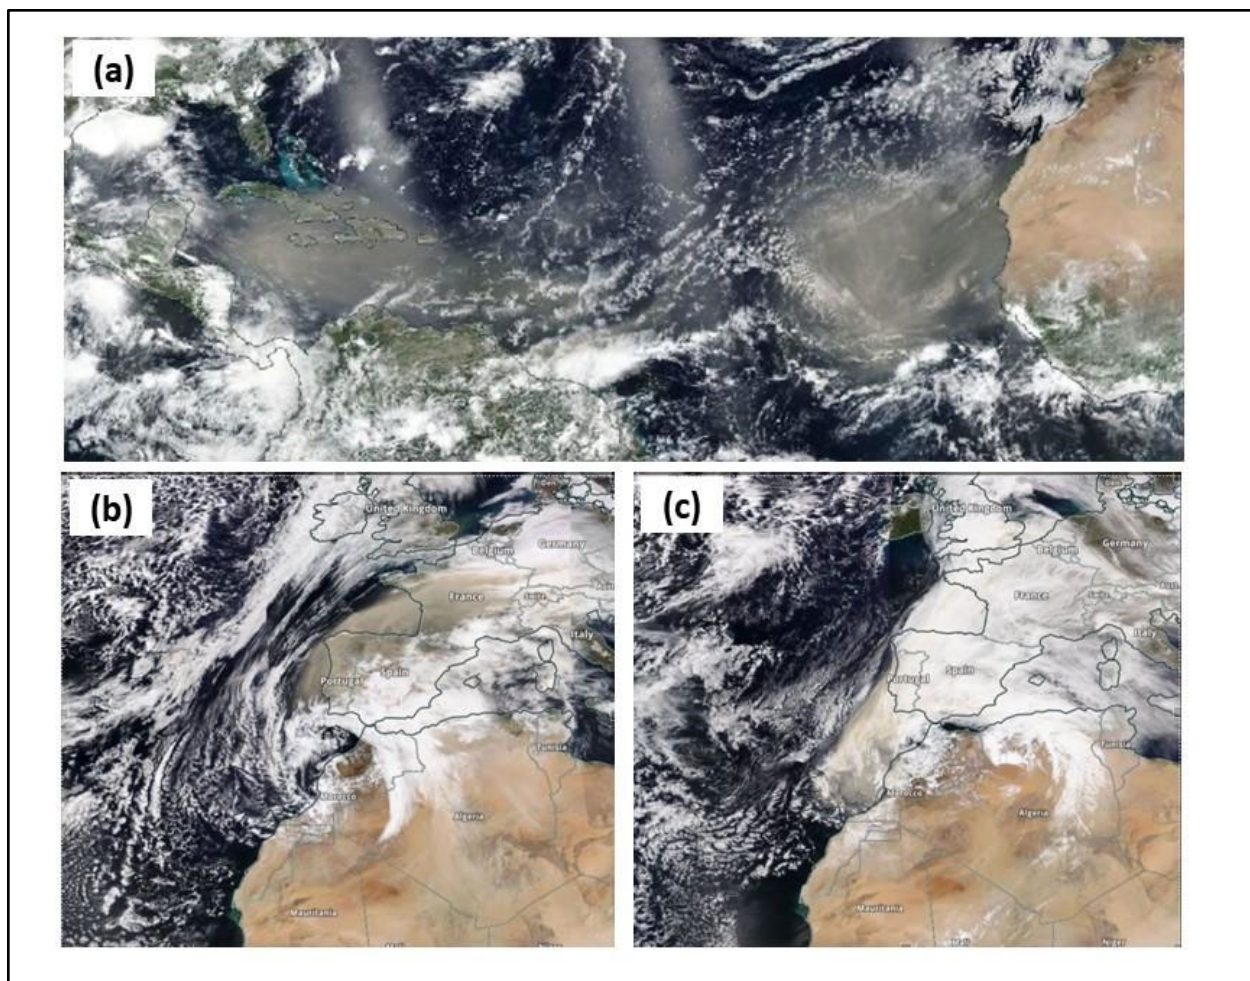

10  
 11 *Figure S2. Suomi NPP satellite image showing (a) the first dust pulse affecting the Caribbean (Puerto Rico) while*  
 12 *a second dust pulse is observed leaving Africa over the North Atlantic on 23 June 2020 (DOY 175), (b) the dust*  
 13 *storm that impacted the León site on 16 March 2022 (DOY 75) and (c) on 17 March 2022 (DOY 76).*

14  
 15 **Methodology for processing WIBS measurements.**

16  
 17 When processing WIBS measurements, there are several steps to filter and correct the data: 1)  
 18 removal of background fluorescence, 2) removal of non-FAPs that fluoresce and 3) correcting for  
 19 “dead-time” losses of FAP that pass undetected particles during the period (dead-time) when the  
 20 Xenon lamp recharging. Each time a particle is detected some fraction of the flash lamp light leaks  
 21 through the detector filters (Perring et al., 2015). Using the Perring et al. (2015) approach we create  
 22 frequency distributions of the FL-1, FL-2 and FL-3 fluorescence intensity measured by the  
 23 detectors (Fig. S3a) and identify the peak and standard deviation around that peak. In Fig. S3a the  
 24 vertical lines mark one standard deviation ( $\sigma$ ) beyond the maxima (reprinted from Calvo et al.,  
 25 2018, Appendix A1). Given that many non-FAP will fluoresce at relatively low levels, we decided  
 26 to accept only those FAP whose fluorescence was  $> 9\sigma$ , using the same threshold as Morrison et

27 al. (2020), so that our results could be compared directly with those from their dust study. This  
 28 procedure effectively removes the background noise and fluorescing non-FAPs.

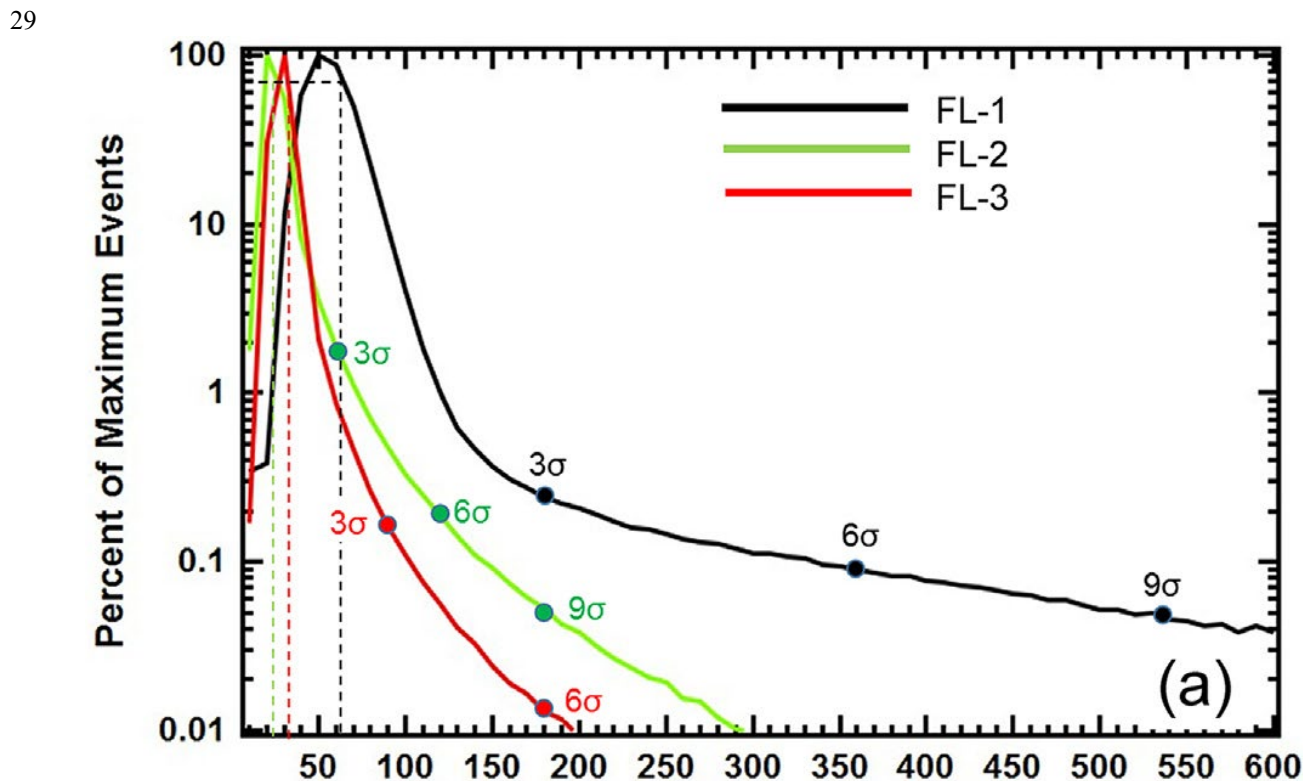

30  
 31 **Figure S3. (a) Frequency histograms of the fluorescence intensity measured with detectors FL-1, -2 and -3 of all**  
 32 **particles sampled during the 30 days field campaign. The vertical bars indicate one standard deviation ( $\sigma$ ) from**  
 33 **the mean value. The colored markers show 3, 6 and 9  $\sigma$ .**

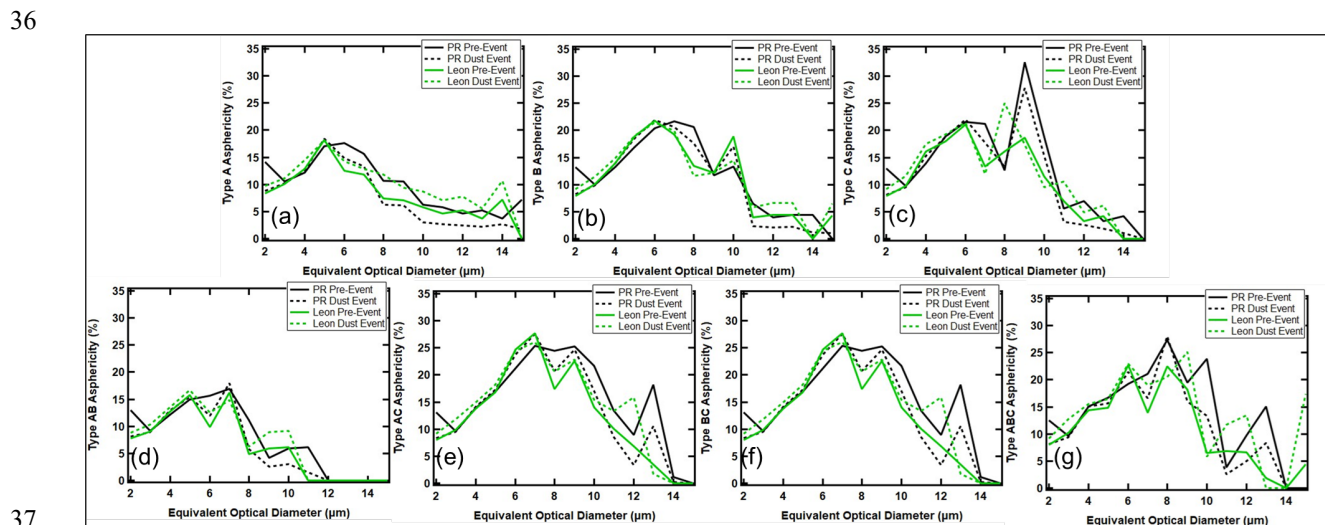

37  
 38 **Figure S4. Average size distributions in PR and León, before and during AD events AD events for the asphericity**  
 39 **of FAP (a) Type A, (b) Type B, (c) Type C, (d) Type AB, (e) Type AC, (f) Type BC, (g) Type ABC**

40  
 41 **Meteorological Measurements**

42

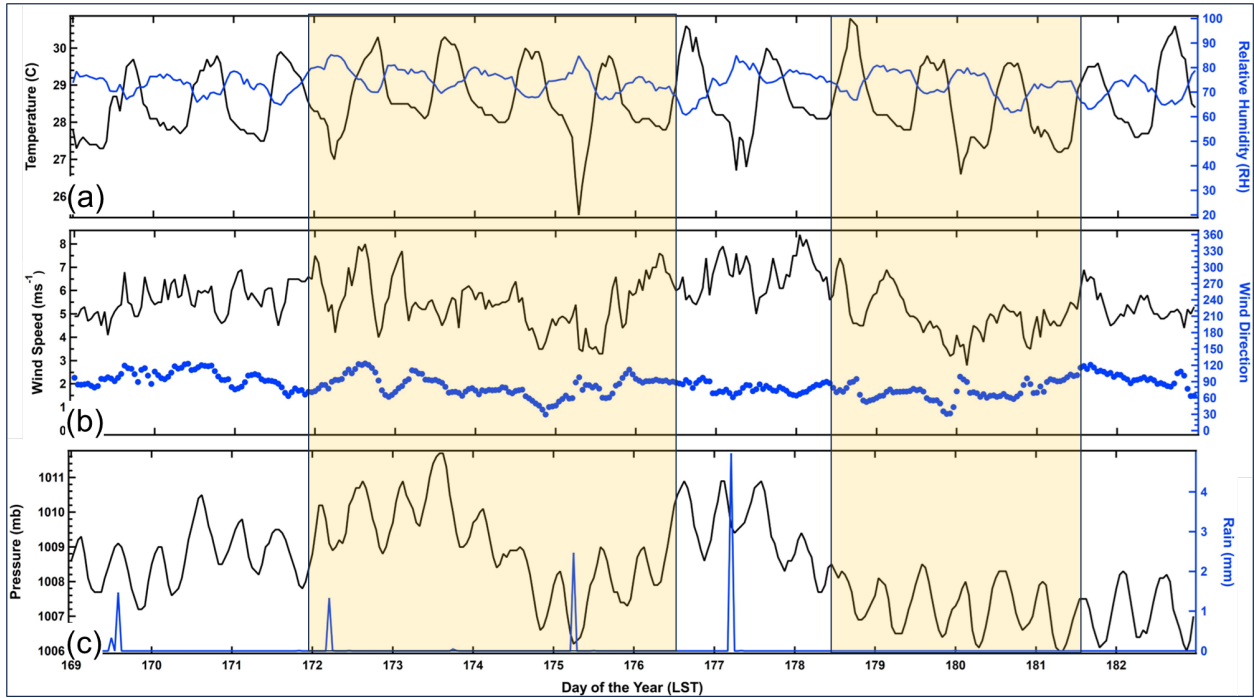

43  
44  
45  
46  
47

*Figure S5. Time series of the meteorological parameters in PR during the month of June 2020. The shaded areas are those time periods when AD was in the PR region.*

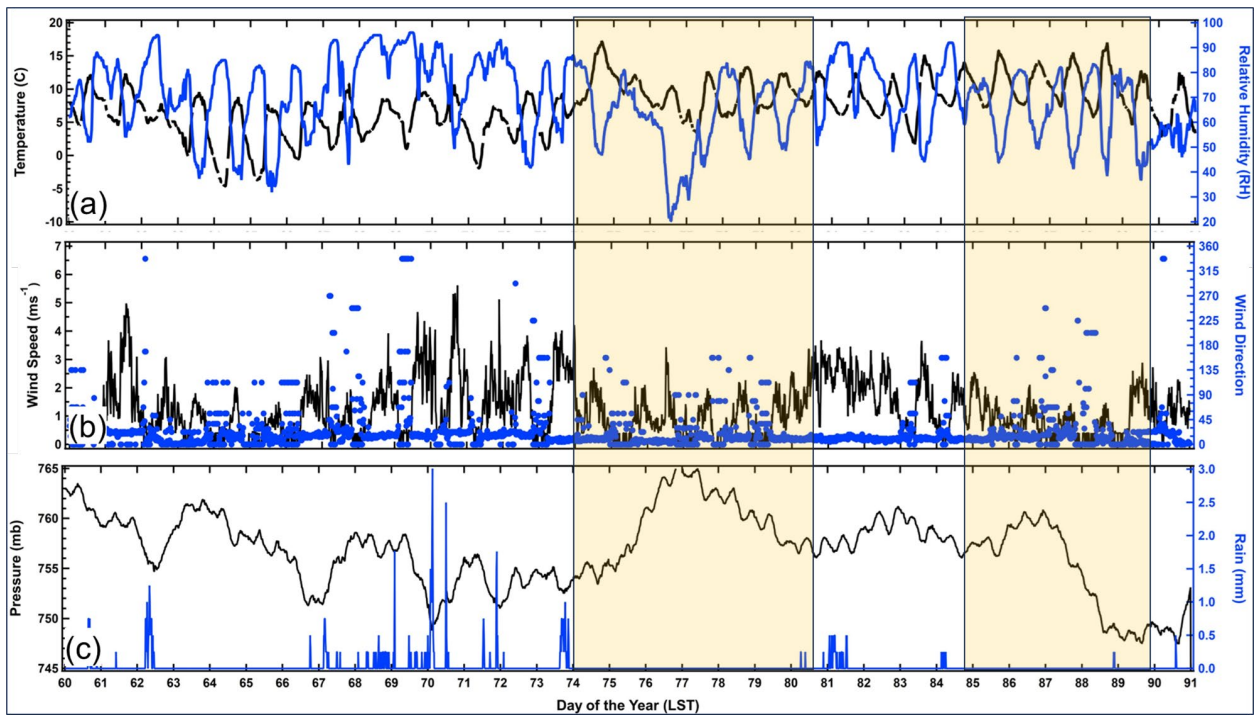

48  
49  
50  
51  
52

*Figure S6. Time series of the meteorological parameters in León during the month of March 2022. The shaded areas are those time periods when AD was in the León region.*

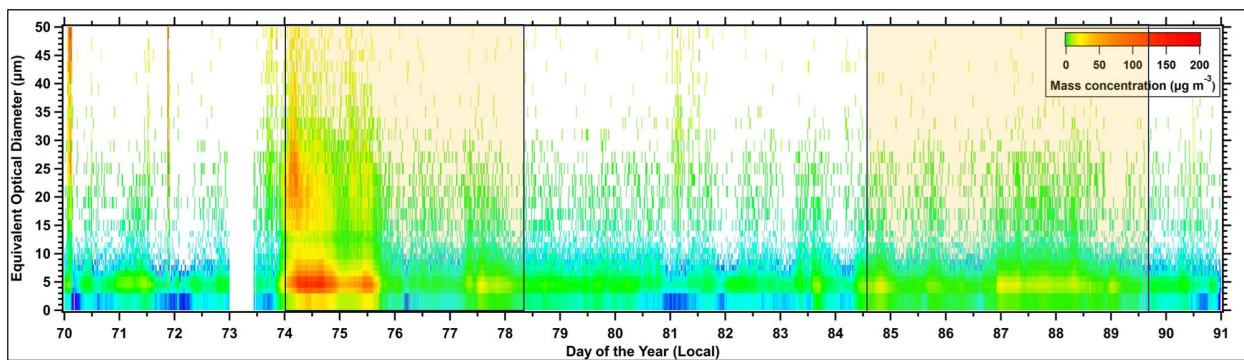

53  
54 **Figure S7.** Time series in León of the mass concentration size distributions measured with the FM-120. The shaded  
55 areas demarcate the time periods when AD was in the region.  
56

57  
58

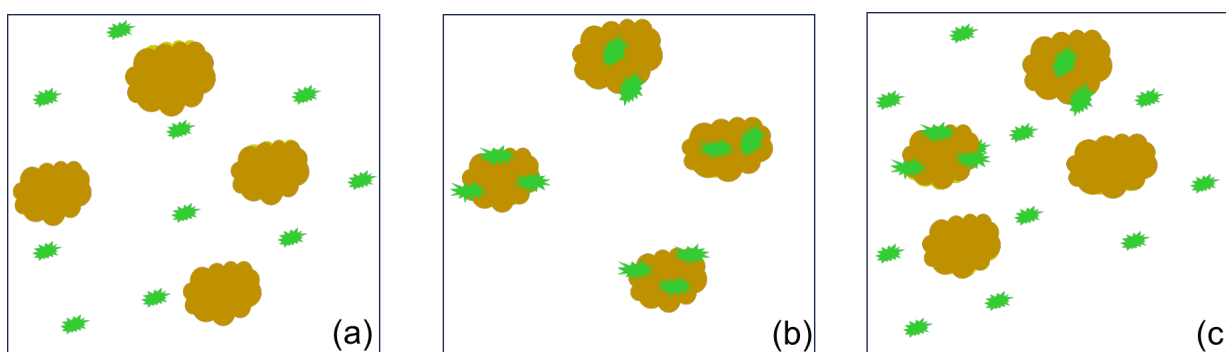

59  
60 **Figure S8.** The three possible mixing states of the FAP (green markers) with other aerosols (brown markers) are  
61 shown here as (a) externally mixed, whereby each aerosol particle has a distinct composition, independent from  
62 the others, (b) internally mixed, where every particle can have one or more mixtures of composition and (c) the  
63 aerosol population is both internally and externally mixed.  
64

## 65 References

- 66  
67 Calvo, A. I., D. Baumgardner, A. Castro, D. Fernández-González, A. M. Vega-Maray, R. M.  
68 Valencia-Barrera, F. Oduber, C. Blanco-Alegre, and R. Fraile.: Daily behavior of urban  
69 Fluorescing Aerosol Particles in northwest Spain, *Atmospheric Environment*, 184, 262-277, 2018.  
70  
71 Perring, A.E., Schwarz, J.P., Baumgardner, D., Hernandez, M.T., Spracklen, D.V., Heald, C.L.,  
72 Gao, R.S., Kok, G., McMeeking, G.R., McQuaid, J.B., Fahey, D.W.: Airborne observations of  
73 regional variation in fluorescent aerosol across the United States. *J. Geophys. Res. Atmos.* 120,  
74 1153–1170, 2015.  
75  
76 Savage, N., Krentz, C., Könemann, T., Han, T.T., Mainelis, G., Pöhlker, C., Huffman, J.A.:  
77 Systematic characterization and fluorescence threshold strategies for the Wideband integrated  
78 bioaerosol sensor (WIBS) using size-resolved biological and interfering particles. *Atmos. Meas.*  
79 *Tech. Discuss* 10, 4279–4302, 2017, <https://doi.org/10.5194/amt-2017-170>.
